# Supplementary material
Source: publisher figshare collection journal article supplement (https://gsajournals.figshare.com/ndownloader/files/13471565)
Supplement: Supplementary file 1 [file 13471565]

## Sheet: Table S4
	Table S4: Iso-Seq read sequencing and standard PacBio clustering pipeline statistics
	Library size range	Growth stage	Full-Length Non-Chimeric Transcripts		Clustered consensus
			Number of isoforms	Median size (bp)	Number of isoforms	Median size (bp)
	1-2 kbp	Pre-véraison	39233	1293	3575	1331
		Véraison	42430	1273	3945	1304
		Post-véraison	43226	1263	3903	1312
		Harvest	47079	1258	4577	1311
	2-3 kbp	Pre-véraison	39817	2248	3290	2267
		Véraison	36018	2267	2884	2270
		Post-véraison	34838	2261	2700	2277
		Harvest	37161	2262	2853	2278
	3-6 kbp	Pre-véraison	60380	3341	2905	3433
		Véraison	47760	3331	1754	3403
		Post-véraison	49299	3340	1753	3398
		Harvest	49529	3324	1735	3406
	5-10 kbp	Pre-véraison	40727	5219	3041	5266
		Véraison	40096	5256	2900	5322
		Post-véraison	39767	5220	3064	5282
		Harvest	25275	5217	1796	5284
	All		672635	3057	46675	2369
	Average		42039.7	3023.31	2917.19	3071.5
	Standard deviation		7837.08	1515.18	848.826	1527.97
